# Supplementary material for: Template synthesis of the hierarchically structured MFI zeolite with nanosheet frameworks and tailored structure
Source: Royal Society of Chemistry journal article supplement (doi:10.1039/c4nj00756e), 2014-06-24
Supplement: c4nj00756e1.pdf [file c4nj00756e1.pdf]

## Supporting Information

### Template synthesis of hierarchically structured MFI

#### zeolite with nanosheet frameworks and tailored structure

Baoyu Liu, Qianqian Duan, Chao Li, Zhihong Zhu, Hongxia Xi\* and Yu Qian

School of Chemistry and Chemical Engineering, South China University of Technology,  
Guangzhou, China 510640. E-mail: [cehxxi@scut.edu.cn](mailto:cehxxi@scut.edu.cn)

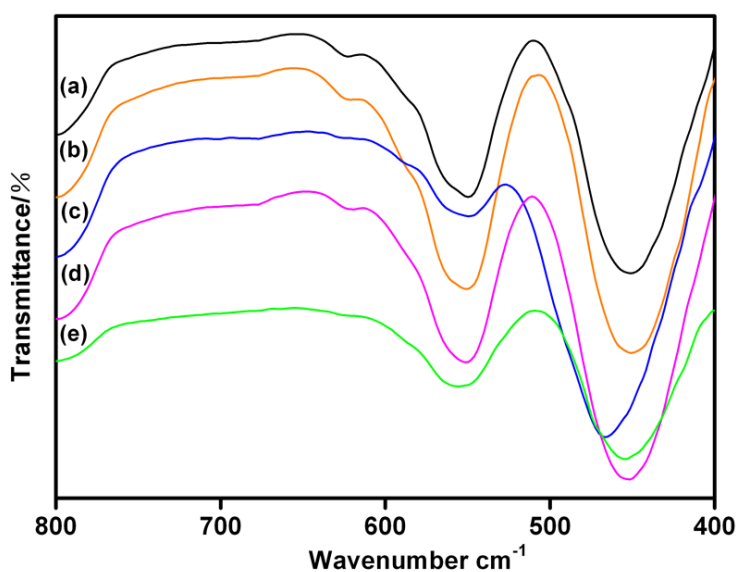

**Figure. S1** IR spectra of calcined samples synthesized using (a) C<sub>6-6</sub>-diphe, (b) C<sub>6-10</sub>-diphe, (c) C<sub>6-12</sub>-diphe, (d) C<sub>4-10</sub>-diphe and (e) C<sub>8-10</sub>-diphe surfactants.

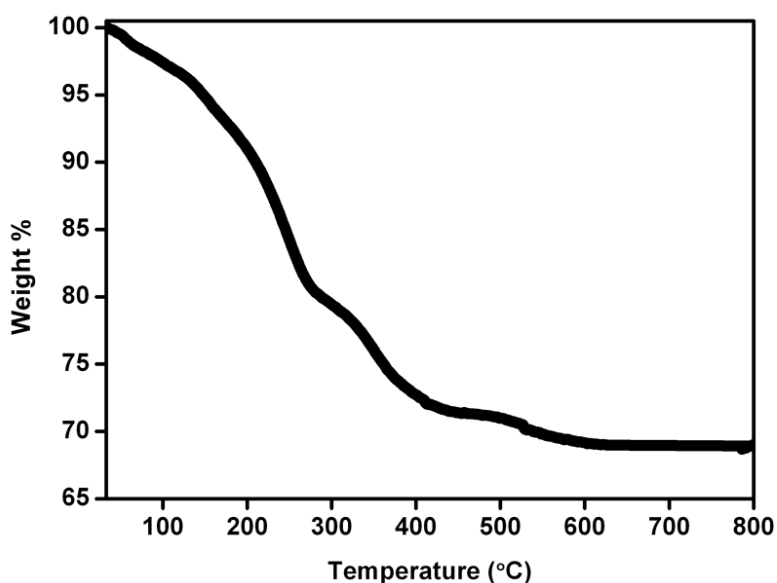

**Figure. S2** TGA curve of as-synthesized MFI zeolite nanosheet with C<sub>6-10</sub>-diphe surfactant.

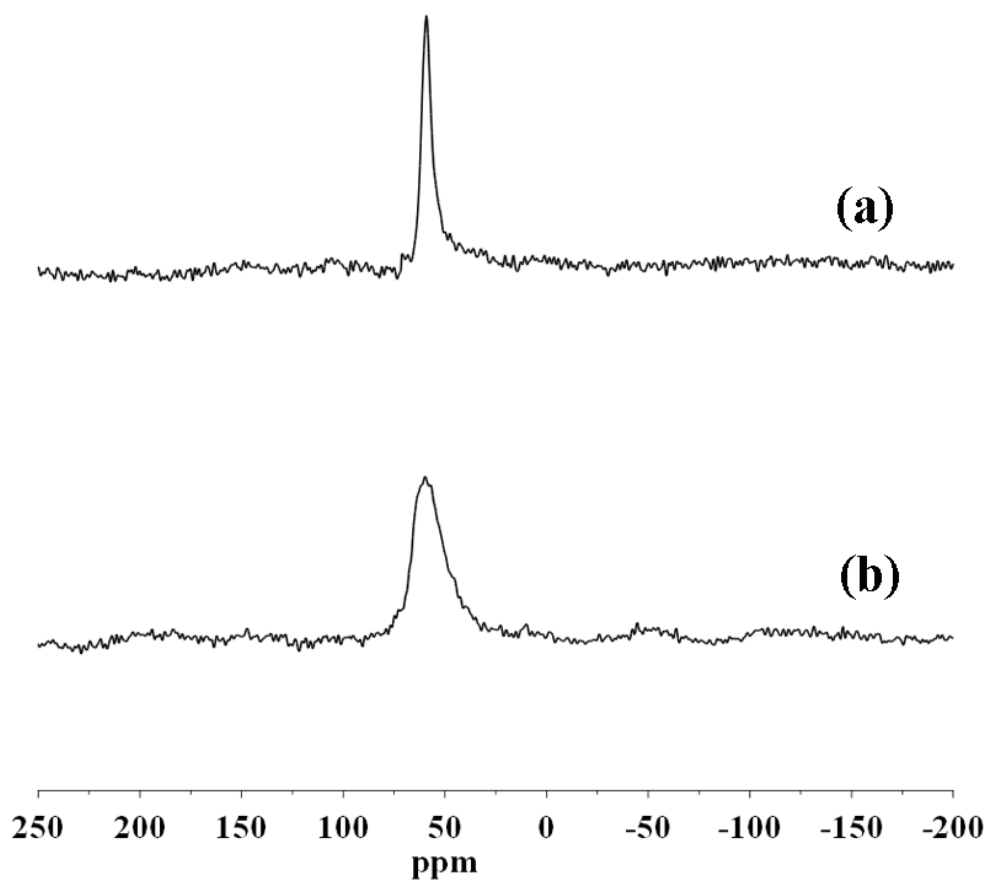

**Figure. S3**  $^{27}\text{Al}$  MAS NMR spectra of (a) as-synthesized and (b) calcined MFI zeolite nanosheet obtained with  $\text{C}_{6-12}$ -diphe surfactant.

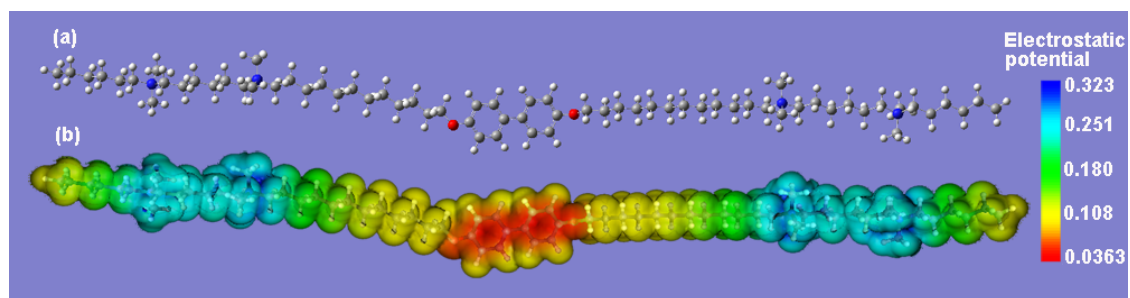

**Figure. S4** (a) Optimized structure and (b) molecular electrostatic potential map of the  $\text{C}_{6-12}$ -diphe surfactant (atom legend: white = H; gray = C; blue = N; red = O).
